# Supplementary material for: Insertional mutagenesis by theTol2transposon-mediated enhancer trap approach generated mutations in two developmental genes:tcf7andsynembryn-like
Source: Oxford University Press journal article supplement (doi:10.1242/dev.009050), 2007-12-07
Supplement: dev009050tables1.pdf [file dev009050tables1.pdf]

| Insertion | Accession | GFP pattern                       | Stage  | Nearest gene                                        | Position          | Expression                | Homo        |
|-----------|-----------|-----------------------------------|--------|-----------------------------------------------------|-------------------|---------------------------|-------------|
| HG2A      | AB353972  | Myotome                           | 24 hpf | AB247645 (chot1)*                                   | intron            | myotome*                  | viable      |
| HG3A      | AB353973  | Skin                              | 24 hpf | AB303423 (cyp2e2)*                                  | intron            | skin*                     | viable      |
| HG6A      | AB353974  | Myotome                           | 24 hpf | AB303424 (ide)*                                     | intron            | myotome*                  | viable      |
| HG6B      | AB353975  | Head, myotome                     | 24 hpf | AB247646 (soxlz)*                                   | intron            | myotome*                  | viable      |
| HG6C      | AB353976  | Notochord                         | 24 hpf | AB303425 (uros)*                                    | intron            | ventral mesoderm*         | viable      |
| HG6D      | AB353977  | Myotome                           | 24 hpf | AB303426 (asb1)*                                    | intron            | whole body (weak)*        | viable      |
| HG9B      | AB353978  | Cells on the skin                 | 24 hpf | ENSDARG00000063017 (TTLL4 homolog)                  | exon              | whole body (weak)*        | viable      |
| HG9C      | AB353979  | Cranial ganglia                   | 24 hpf | NA                                                  |                   |                           | viable      |
| HG10A     | AB353980  | Forebrain, myotome                | 24 hpf | zgc:76938 (fancl)                                   | exon              | NA                        | viable      |
| HG10B     | AB353981  | Cells on the skin                 | 24 hpf | AB303427 (ripk2)*                                   | intron            | whole body (weak)*        | viable      |
| HG10C     | AB353982  | Whole body                        | 24 hpf | NA                                                  |                   |                           | viable      |
| HG21A     | AB353983  | Myotome                           | 24 hpf | AB247647 (lmo7)*                                    | intron            | myotome*                  | viable      |
| HG21B     | AB353987  | Otic vesicle, myotome             | 24 hpf | AB247648 (novel gene)*                              | intron            | otic vesicle*             | viable      |
| HG21C     | AB353984  | Fin folds                         | 24 hpf | AB303428 (tcf7)*                                    | exon              | fin folds*                | fin defects |
| HG21E     | AB353985  | Forebrain, eye                    | 24 hpf | zgc:92692 (crystallin homolog)                      | 15 kb downstream  | NA                        | viable      |
| HG21K     | AB353986  | Spinal cord                       | 24 hpf | ENSDARG00000062396 (novel gene)                     | 7.5 kb downstream | NA                        | viable      |
| HGn6A     | AB353988  | Whole body                        | 26 hpf | NA                                                  |                   |                           | viable      |
| HGn8E     | AB353989  | Heart                             | 24 hpf | ENSDARG00000054207 (sialyltransferase homolog)      | intron            | NA                        | viable      |
| HGn8H     | AB353990  | CNS                               | 24 hpf | AB354736 (synbl)                                    | intron            | whole body*               | lethal      |
| HGn12B    | AB353991  | Otic vesicle                      | 25 hpf | zgc:65749 (unknown)                                 | 2 kb upstream     | NA                        | viable      |
| HGn12C    | AB353992  | Pretectum                         | 30 hpf | NA                                                  |                   |                           | viable      |
| HGn12F    | AB353993  | Brain, lens                       | day 3  | NA                                                  |                   |                           | ND          |
| HGn12H    | AB353994  | Brain                             | day 5  | ENSDARG00000027887 (zfyve21)                        | 47 kb downstream  | whole body, brain         | ND          |
| HGn12J    | AB353995  | Floor plate                       | 24 hpf | zgc:66419 (hook homolog)                            | 45 kb upstream    | NA                        | viable      |
| HGn14C    | AB353996  | Myotome and lens                  | 36 hpf | NA                                                  |                   |                           | viable      |
| HGn15A    | AB353997  | Notochord                         | 24 hpf | ENSDARG00000005333 (tln1)                           | intron            | notochord                 | viable      |
| HGn15B    | AB353998  | Whole body                        | 24 hpf | ENSDARG00000061750 (sphingomyelin synthase homolog) | 7.7 kb upstream   | NA                        | ND          |
| HGn16A    | AB353999  | Forebrain, hindbrain, myotome     | 24 hpf | NA                                                  |                   |                           | viable      |
| HGn20A    | AB354000  | Forebrain, MHB                    | 36 hpf | zgc:158431 (unknown)                                | 56 kb upstream    | NA                        | ND          |
| HGn20B    | AB354001  | Hindbrain                         | 36 hpf | NA                                                  |                   |                           | ND          |
| HGn20C    | AB354002  | Midbrain                          | 24 hpf | ENSDARG00000015243 (novel gene)                     | 21 kb upstream    | NA                        | ND          |
| HGn20D    | AB354003  | Tectum                            | 25 hpf | zgc:55390 (ampd3)                                   | 112 kb upstream   | blood, epidermis          | ND          |
| HGn20E    | AB354004  | Pectoral fin                      | 48 hpf | zgc:136669 (egfl7)                                  | intron            | NA                        | ND          |
| HGn21A    | AB354005  | Notochord                         | 24 hpf | ENSDARG00000007356 (fgf20a)                         | 1.7 kb upstream   | NA                        | viable      |
| HGn22A    | AB354006  | Eye, myotome                      | 26 hpf | zgc:86646 (rcn3)                                    | 3.8 kb upstream   | head, notochord           | viable      |
| HGn23A    | AB354007  | Nose, lens                        | day 3  | NA                                                  |                   |                           | ND          |
| HGn25A    | AB354008  | Neural tube                       | 24 hpf | ENSDARG00000071496 (zic6)*                          | 57 kb downstream  | NA                        | viable      |
| HGn25B    | AB354009  | Otic vesicle                      | 26 hpf | ENSDARG00000032868 (PDE homolog)                    | 46 kb upstream    | —                         | viable      |
| HGn25C    | AB354010  | Forebrain                         | 24 hpf | ENSDARG00000039495 (unknown)                        | 210 kb upstream   | NA                        | viable      |
| HGn25D    | AB354011  | Law, lens, heart                  | day 3  | NA                                                  |                   |                           | ND          |
| HGn26A    | AB354012  | Myotome, skin                     | 34 hpf | NA                                                  |                   |                           | viable      |
| HGn26B    | AB354013  | Eye, forebrain, tectum            | 25 hpf | NA                                                  |                   |                           | viable      |
| HGn28A    | AB354014  | Otic vesicle, arches, skin        | 24 hpf | ENSDARG00000016526 (gata3)                          | 26 kb downstream  | otic vesicle, arches, etc | viable      |
| HGn30A    | AB354015  | Hatching gland                    | 24 hpf | NA                                                  |                   |                           | viable      |
| HGn31A    | AB354016  | Forebrain, hindbrain, spinal cord | 24 hpf | NA                                                  |                   |                           | ND          |
| HGn31B    | AB354017  | Cranial ganglis, spinal cord      | 26 hpf | ENSDARG00000023288 (novel gene)                     | 103 kb downstream | NA                        | ND          |

|        |          |                        |        |                                                         |                   |                  |  |        |
|--------|----------|------------------------|--------|---------------------------------------------------------|-------------------|------------------|--|--------|
| HGn32A | AB354018 | Hindbrain              | 33 hpf | NA                                                      |                   |                  |  | viable |
| HGn32B | AB354019 | Midbrain               | 26 hpf | ENSDARG00000039412 (dmrta2)*                            | 36 kb downstream  | NA               |  | viable |
| HGn34A | AB354020 | Myotome, fin folds     | 24 hpf | ENSDARG00000003217 (unknown)                            | 17 kb downstream  | NA               |  | ND     |
| HGn34B | AB354021 | CNS, eye               | 24 hpf | ENSDARG00000006837 (mycn)                               | 17 kb downstream  | brain            |  | viable |
| HGn36A | AB354022 | Neurons                | 36 hpf | ENSDARG00000021733 (unknown)                            | 5.1 kb downstream | NA               |  | viable |
| HGn39B | AB354023 | Heart, myotome         | 24 hpf | zgc:136821 (ahsa1)                                      | intron            | myotome          |  | viable |
| HGn39C | AB354024 | Whole body             | 24 hpf | NA                                                      |                   |                  |  | viable |
| HGn39D | AB354025 | Lateral line, lens     | day 5  | ENSDARG00000063251 (unknown)                            | 0.6 kb upstream   | NA               |  | viable |
| HGn42A | AB354026 | Eye                    | 24 hpf | ENSDARG00000054327 (novel gene)                         | 20 kb upstream    | NA               |  | viable |
| HGn42D | AB354027 | Myotome                | day 5  | ENSDARG00000060236 (dok7)                               | intron            | NA               |  | viable |
| HGn43A | AB354028 | Forebrain              | 26 hpf | ENSDARG00000061191 (novel gene)                         | intron            | NA               |  | viable |
| HGn44B | AB354029 | Hindbrain, spinal cord | 31 hpf | ENSDARG00000005783 (ncan)                               | intron            | NA               |  | ND     |
| HGn44E | AB354030 | Myotome                | 31 hpf | NA                                                      |                   |                  |  | ND     |
| HGn46C | AB354031 | Telencephalon          | 25 hpf | zgc:56483 (vrk2)                                        | 0.5 kb upstream   | NA               |  | viable |
| HGn46E | AB354032 | Notochord              | 30 hpf | NA                                                      |                   |                  |  | viable |
| HGn46F | AB354033 | Myotome, yolk          | 30 hpf | ENSDARG00000057057 (novel gene)                         | 61 kb upstream    | NA               |  | viable |
| HGn50A | AB354034 | Forebrain              | 26 hpf | NA                                                      |                   |                  |  | ND     |
| HGn50B | AB354035 | Epiphysis, nose        | 25 hpf | ENSDARG00000053026 (kinesin homolog)                    | intron            | NA               |  | viable |
| HGn50D | AB354037 | Yolk                   | 24 hpf | NA                                                      |                   |                  |  | viable |
| HGn50E | AB354036 | Brain, lens            | day 5  | NA                                                      |                   |                  |  | viable |
| HGn50G | AB354038 | Myotome, fin folds     | 36 hpf | ENSDARG00000062126 (unknown)                            | 12 kb upstream    | NA               |  | viable |
| HGn53D | AB354039 | Fin folds              | 24 hpf | ENSDARG00000011512 (novel gene)                         | intron            | NA               |  | viable |
| HGn54A | AB354040 | Hatching gland         | 34 hpf | ENSDARG00000057975 (PLC)                                | 9 kb downstream   | NA               |  | ND     |
| HGn54B | AB354041 | Cells on the skin      | 24 hpf | ENSDARG00000040059 (gbp)                                | 19 kb upstream    | whole body, CNS  |  | ND     |
| HGn62A | AB354042 | Skin                   | 33 hpf | NA                                                      |                   |                  |  | viable |
| HGn62B | AB354043 | Hatching gland         | 25 hpf | zgc:112012 (semaphorin homolog)                         | 172 kb upstream   | rhombomeres, etc |  | viable |
| HGn63B | AB354044 | CNS                    | 27 hpf | ENSDARG00000061139 (G-protein coupled receptor homolog) | 21 kb downstream  | NA               |  | ND     |

NA in the nearest gene column: not applicable as the cloned sequence was not mapped on the genome.

NA in the pattern column: expression patterns revealed by whole-mount in situ pattern are not available.

ND in the homo column: the phenotypes of homozygous embryos have not been determined.

\*Cloning of cDNA and in situ hybridization were performed in this study.
